# Supplementary material for: Effect of Agricultural Biomass Residues on the Properties of Recycled Polypropylene/Polyethylene Composites
Source: MDPI journal article supplement (doi:10.3390/polym15122672), 2023-06-14
Supplement: s1 [file s1]

**Table S1.** Tensile modulus ( $E_T$ ), tensile strength( $\sigma_T$ ) and strain at break ( $\epsilon_B$ ) of rPPPE composites with BS, SCS, and RS fibers.

| Fiber type | Fiber content, % | $E_T$ , MPa | $\pm$ STDV | $\sigma_T$ , MPa | $\pm$ STDV | $\epsilon_B$ , % | $\pm$ STDV |
|------------|------------------|-------------|------------|------------------|------------|------------------|------------|
| BS         | 0                | 1960        | 67         | 39               | 1.1        | 59               | 11.8       |
|            | 10               | 2269        | 100        | 39               | 1.2        | 8                | 1.0        |
|            | 20               | 2751        | 60         | 40               | 0.8        | 7                | 1.2        |
|            | 30               | 3211        | 80         | 40               | 0.6        | 4                | 0.6        |
|            | 40               | 4359        | 139        | 44               | 0.6        | 3                | 0.2        |
| RS         | 10               | 2175        | 112        | 37               | 0.4        | 14               | 2.7        |
|            | 20               | 2799        | 89         | 38               | 0.4        | 6                | 1.3        |
|            | 30               | 3468        | 62         | 38               | 0.5        | 3                | 0.5        |
|            | 40               | 4620        | 106        | 41               | 0.1        | 2                | 0.8        |
| SCS        | 10               | 2205        | 57         | 37               | 0.4        | 7                | 1.6        |
|            | 20               | 2728        | 191        | 43               | 0.8        | 6                | 1.1        |
|            | 30               | 3546        | 67         | 40               | 0.5        | 4                | 0.5        |
|            | 40               | 4060        | 100        | 40               | 0.7        | 3                | 0.3        |
