# Supplementary material for: Effect of Agricultural Biomass Residues on the Properties of Recycled Polypropylene/Polyethylene Composites
Source: MDPI journal article supplement (doi:10.3390/polym15122672), 2023-06-14
Supplement: s1 [file s1]

**Table S2.** Flexural modulus ( $E_F$ ), maximum flexural stress ( $\sigma_{\max}$ ) and strain at maximum flexural strength ( $\epsilon_{\max}$ ) of rPPPE composites with BS, SCS, and RS fibers before and after immersion in water.

| Fiber type      | Fiber content, % | $E_F$ , MPa | $\pm$ STDV | $\sigma_{\max}$ , MPa | $\pm$ STDV | $\epsilon_{\max}$ , % | $\pm$ STDV |
|-----------------|------------------|-------------|------------|-----------------------|------------|-----------------------|------------|
| BS              | 0                | 1427        | 79         | 40                    | 1.1        | 7                     | 0.1        |
|                 | 10               | 1861        | 36         | 47                    | 0.4        | 6                     | 0.3        |
|                 | 20               | 2378        | 108        | 50                    | 0.3        | 5                     | 0.1        |
|                 | 30               | 3220        | 39         | 57                    | 0.1        | 4                     | 0.1        |
|                 | 40               | 3930        | 60         | 60                    | 1.0        | 3                     | 0.2        |
| RS              | 10               | 1744        | 47         | 43                    | 0.5        | 6                     | 0.1        |
|                 | 20               | 2308        | 102        | 49                    | 0.8        | 5                     | 0.2        |
|                 | 30               | 2724        | 127        | 50                    | 1.3        | 4                     | 0.1        |
|                 | 40               | 3615        | 45         | 55                    | 0.5        | 3                     | 0.1        |
|                 | 10               | 1865        | 100        | 48                    | 0.5        | 6                     | 0.2        |
| SCS             | 20               | 2125        | 39         | 50                    | 0.7        | 6                     | 0.1        |
|                 | 30               | 2540        | 20         | 49                    | 1.1        | 4                     | 0.2        |
|                 | 40               | 2933        | 78         | 51                    | 0.8        | 4                     | 0.1        |
| after immersion |                  |             |            |                       |            |                       |            |
| BS              | 0                | 1677        | 19         | 44                    | 0.2        | 7                     | 0.1        |
|                 | 10               | 2218        | 4          | 52                    | 0.4        | 6                     | 0.1        |
|                 | 40               | 2860        | 195        | 52                    | 0.4        | 3                     | 0.3        |
|                 | 10               | 2161        | 49         | 51                    | 0.6        | 6                     | 0.0        |
|                 | 40               | 2900        | 68         | 48                    | 0.9        | 3                     | 0.2        |
| AS              | 10               | 2096        | 12         | 52                    | 0.2        | 6                     | 0.0        |
|                 | 40               | 3026        | 26         | 53                    | 0.7        | 4                     | 0.2        |
